# Supplementary material for: Synthesis of a [60]fullerene-end-capped polyacetylene derivative – a “rod-sphere” molecule from a “coil-sphere” precursor
Source: Royal Society of Chemistry journal article supplement (doi:10.1039/c5py01674f), 2015-12-28
Supplement: c5py01674f1.pdf [file c5py01674f1.pdf]

## Electronic supplementary information (ESI)

### Synthesis of [60]Fullerene-End-Capped Polyacetylene Derivative – A “Rod-Sphere” Molecule from “Coil-Sphere” Precursor

Gang Qi, Yunhai Yu, Junpo He\*

State Key Laboratory of Molecular Engineering of Polymers, Department of Macromolecular Science,  
Fudan University, Shanghai, 200433, China

\* E-mail: jphe@fudan.edu.cn.

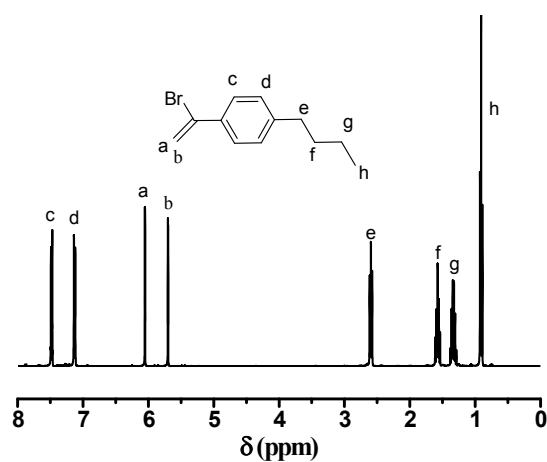

Figure S1. <sup>1</sup>H NMR spectrum of 1-(1'-bromovinyl)-4-butylbenzene (400 MHz).

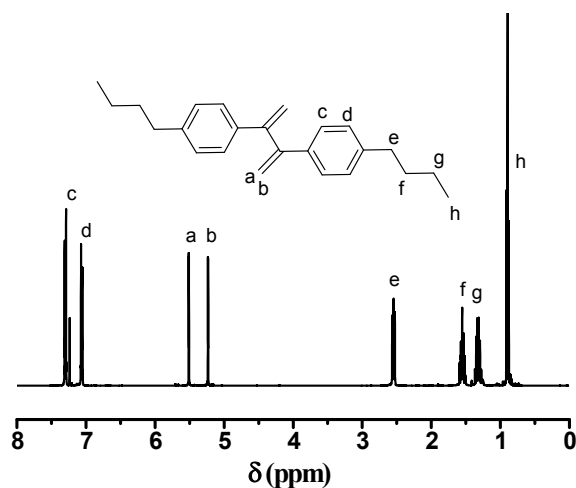

Figure S2. <sup>1</sup>H NMR spectrum of diBPBd (400 MHz).

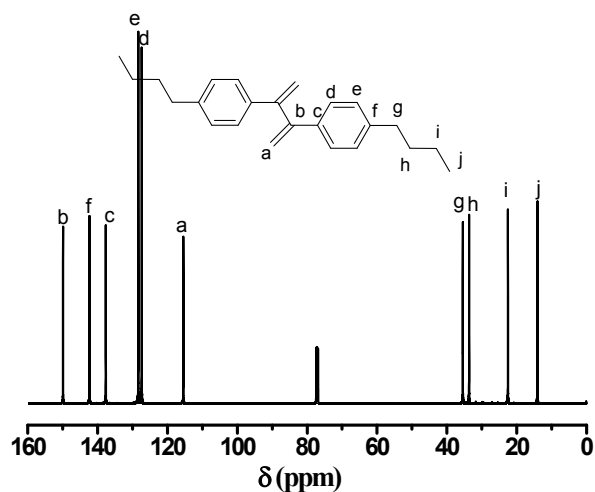

**Figure S3.** <sup>13</sup>C NMR spectrum of diBPBd (400 MHz).

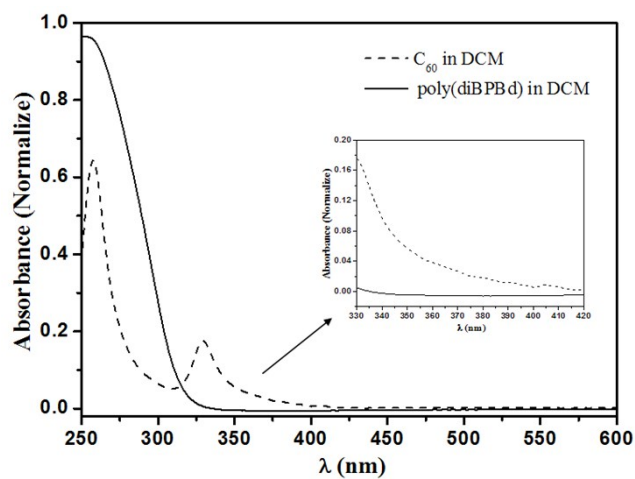

**Figure S4.** UV spectra of poly(diBPBd) and C<sub>60</sub> in DCM.

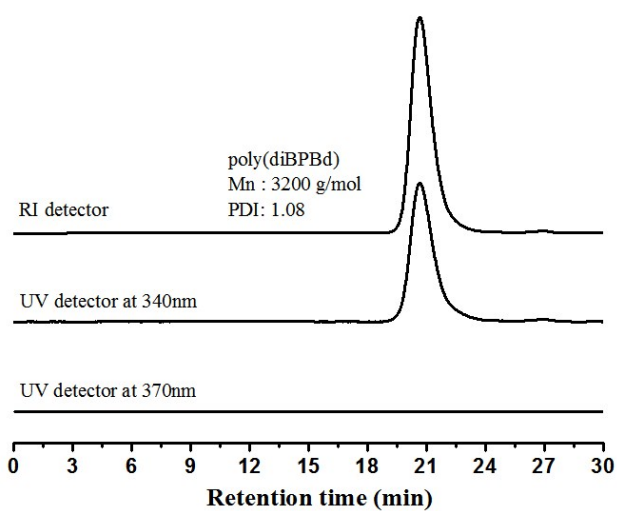

**Figure S5.** GPC curves of poly(diBPBd) using different UV detectors.

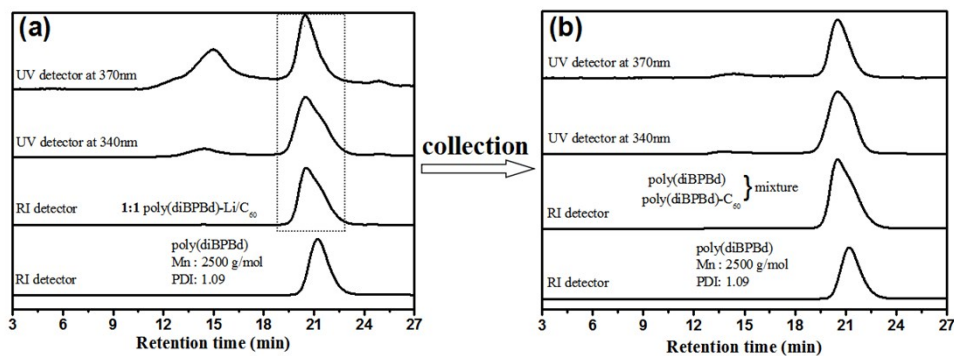

Figure S6. GPC traces of fractions collected by preparative GPC (step 1).

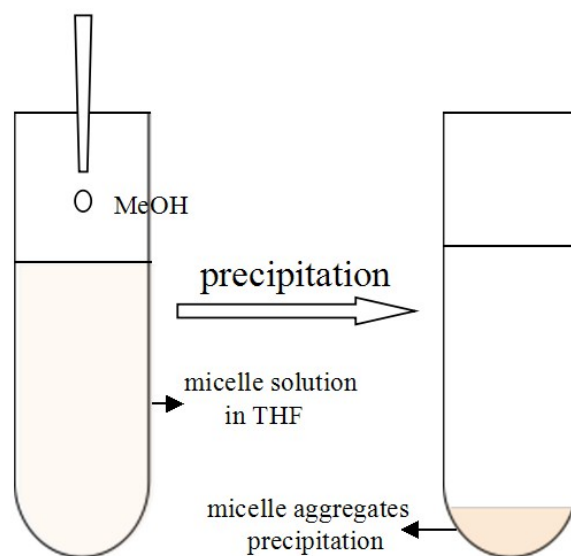

Figure S7. The general precipitation process (step 2).

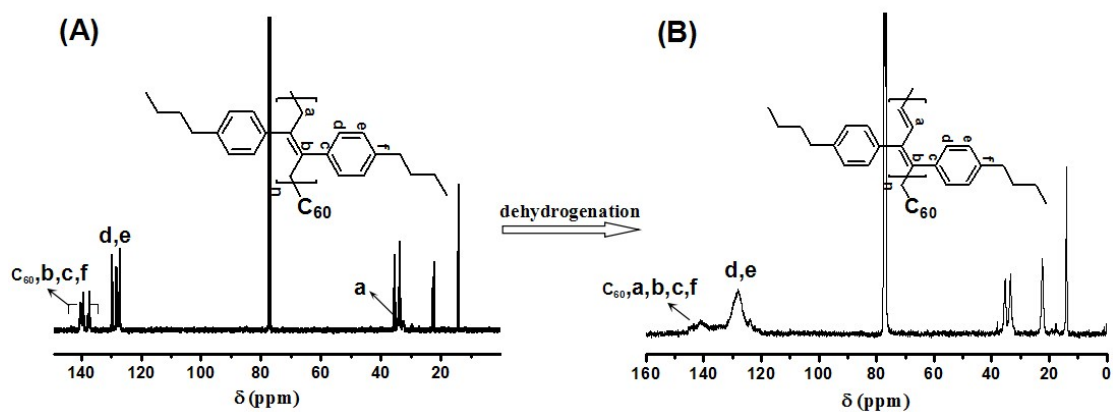

Figure S8.  $^{13}\text{C}$  NMR spectra of (A) poly(diBPBd)- $\text{C}_{60}$  and (B) sPA- $\text{C}_{60}$ .

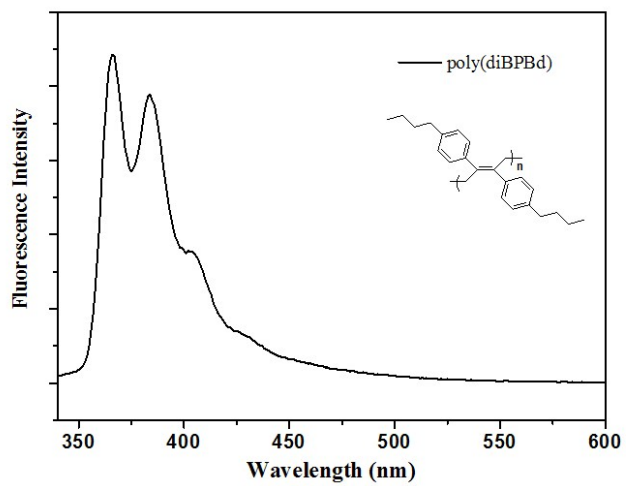

**Figure S9.** Emission spectrum of poly(diBPBd) in DCM under the excitation at 320 nm.
